# Supplementary material for: SARS-CoV-2 Infection in Venezuelan Pediatric Patients—A Single Center Prospective Observational Study
Source: MDPI journal article supplement (doi:10.3390/biomedicines11051409), 2023-05-09
Supplement: s1 [file s1]

| <b>Pacient</b> | <b>clinical severity</b> | <b>Nutrition Diagnosis</b> | <b>comorbidity</b> | <b>complications</b>  |
|----------------|--------------------------|----------------------------|--------------------|-----------------------|
| 1              | severe                   | NORMAL                     | NO                 | bacterial coinfection |
| 2              | severe                   | Malnutrition               | asthma             | MIS- C                |
| 3              | moderate                 | NORMAL                     | NO                 | NO                    |
| 4              | mild                     | NORMAL                     | NO                 | NO                    |
| 5              | moderate                 | Malnutrition               | NO                 | NO                    |
| 6              | moderate                 | NORMAL                     | NO                 | MIS- C                |
| 7              | mild                     | NORMAL                     | NO                 | NO                    |
| 8              | severe                   | Malnutrition               | NO                 | bacterial coinfection |
| 9              | moderate                 | NORMAL                     | asthma             | MIS- C                |
| 10             | moderate                 | NORMAL                     | asthma             | MIS- C                |
| 11             | moderate                 | Overweight-obese           | NO                 | NO                    |
| 12             | moderate                 | NORMAL                     | NO                 | bacterial coinfection |
| 13             | severe                   | NORMAL                     | nephropathy        | MIS- C                |
| 14             | moderate                 | NORMAL                     | NO                 | bacterial coinfection |
| 15             | moderate                 | NORMAL                     | NO                 | NO                    |
| 16             | mild                     | Malnutrition               | NO                 | NO                    |
| 17             | mild                     | NORMAL                     | NO                 | MIS- C                |
| 18             | mild                     | NORMAL                     | NO                 | viral coinfection     |
| 19             | severe                   | Malnutrition               | CANCER             | NO                    |
| 20             | mild                     | NORMAL                     | NO                 | MIS- C                |
| 21             | severe                   | Malnutrition               | NO                 | MIS- C                |
| 22             | severe                   | NORMAL                     | NO                 | MIS- C                |
| 23             | severe                   | Malnutrition               | nephropathy        | NO                    |
| 24             | moderate                 | Malnutrition               | NO                 | NO                    |
| 25             | moderate                 | NORMAL                     | NO                 | NO                    |
| 26             | mild                     | NORMAL                     | NO                 | MIS- C                |
| 27             | moderate                 | Malnutrition               | NO                 | NO                    |
| 28             | mild                     | Malnutrition               | CANCER             | NO                    |
| 29             | moderate                 | Malnutrition               | NO                 | NO                    |
| 30             | moderate                 | Malnutrition               | asthma             | NO                    |
| 31             | mild                     | NORMAL                     | NO                 | NO                    |
| 32             | moderate                 | Overweight-obese           | NO                 | NO                    |
| 33             | mild                     | Overweight-obese           | NO                 | MIS- C                |
| 34             | mild                     | NORMAL                     | NO                 | MIS- C                |
| 35             | mild                     | Malnutrition               | NO                 | NO                    |
| 36             | mild                     | NORMAL                     | nephropathy        | MIS- C                |
| 37             | mild                     | Malnutrition               | CANCER             | MIS- C                |
| 38             | mild                     | NORMAL                     | NO                 | NO                    |
| 39             | moderate                 | NORMAL                     | NO                 | MIS- C                |
| 40             | moderate                 | NORMAL                     | emoglobinopath     | MIS- C                |
| 41             | moderate                 | NORMAL                     | NO                 | bacterial coinfection |
| 42             | mild                     | NORMAL                     | NO                 | NO                    |
| 43             | mild                     | NORMAL                     | NO                 | NO                    |
| 44             | mild                     | Malnutrition               | e I diabetes mell  | NO                    |

|    |          |              |                |                       |
|----|----------|--------------|----------------|-----------------------|
| 45 | mild     | NORMAL       | asthma         | NO                    |
| 46 | mild     | Malnutrition | NO             | NO                    |
| 47 | moderate | Malnutrition | NO             | NO                    |
| 48 | mild     | NORMAL       | NO             | NO                    |
| 49 | mild     | Malnutrition | nephropathy    | NO                    |
| 50 | mild     | NORMAL       | NO             | NO                    |
| 51 | mild     | NORMAL       | NO             | MIS- C                |
| 52 | mild     | NORMAL       | NO             | NO                    |
| 53 | mild     | NORMAL       | NO             | NO                    |
| 54 | mild     | NORMAL       | NO             | NO                    |
| 55 | mild     | NORMAL       | emoglobinopath | NO                    |
| 56 | mild     | NORMAL       | NO             | NO                    |
| 57 | mild     | NORMAL       | asthma         | NO                    |
| 58 | mild     | Malnutrition | NO             | MIS- C                |
| 59 | moderate | NORMAL       | NO             | MIS- C                |
| 60 | mild     | NORMAL       | NO             | NO                    |
| 61 | moderate | Malnutrition | NO             | MIS- C                |
| 62 | moderate | Malnutrition | NO             | MIS- C                |
| 63 | moderate | NORMAL       | NO             | NO                    |
| 64 | mild     | Malnutrition | CANCER         | NO                    |
| 65 | moderate | Malnutrition | asthma         | bacterial coinfection |
| 66 | mild     | NORMAL       | NO             | NO                    |
| 67 | mild     | Malnutrition | NO             | NO                    |
| 68 | mild     | NORMAL       | NO             | NO                    |
| 69 | moderate | NORMAL       | NO             | NO                    |
| 70 | mild     | Malnutrition | CANCER         | NO                    |
| 71 | mild     | NORMAL       | nephropathy    | NO                    |
| 72 | moderate | NORMAL       | NO             | MIS- C                |

| <i><b>treatment</b></i> | <i><b>sex</b></i> | <i><b>age group</b></i> |
|-------------------------|-------------------|-------------------------|
| dexamethasone           | male              | Infant                  |
| HYDROCORTISONE          | male              | Preschooler             |
| dexamethasone           | female            | Preschooler             |
| no                      | female            | Infant                  |
| HYDROCORTISONE          | female            | Infant                  |
| HYDROCORTISONE          | female            | Infant                  |
| dexamethasone           | female            | Infant                  |
| dexamethasone           | male              | Infant                  |
| dexamethasone           | female            | School-age              |
| dexamethasone           | female            | Preschooler             |
| dexamethasone           | female            | Adolescent              |
| no                      | female            | Infant                  |
| dexamethasone           | male              | Preschooler             |
| no                      | female            | School-age              |
| dexamethasone           | male              | Infant                  |
| no                      | male              | Preschooler             |
| dexamethasone           | female            | Infant                  |
| no                      | female            | Preschooler             |
| dexamethasone           | male              | Preschooler             |
| dexamethasone           | female            | Infant                  |
| METHYLPREDNISOLONE      | female            | Preschooler             |
| dexamethasone           | male              | Infant                  |
| dexamethasone           | male              | Adolescent              |
| METHYLPREDNISOLONE      | female            | Preschooler             |
| dexamethasone           | female            | Infant                  |
| dexamethasone           | male              | Infant                  |
| METHYLPREDNISOLONE      | male              | Infant                  |
| no                      | male              | School-age              |
| METHYLPREDNISOLONE      | female            | Infant                  |
| dexamethasone           | female            | School-age              |
| no                      | female            | Preschooler             |
| dexamethasone           | male              | Infant                  |
| dexamethasone           | male              | Adolescent              |
| dexamethasone           | male              | Infant                  |
| no                      | female            | School-age              |
| dexamethasone           | male              | Preschooler             |
| Dexamethasone +immunog  | female            | School-age              |
| no                      | female            | Infant                  |
| Dexamethasone +immunog  | male              | Preschooler             |
| dexamethasone           | male              | Preschooler             |
| dexamethasone           | male              | Infant                  |
| no                      | female            | School-age              |
| no                      | male              | Adolescent              |
| no                      | female            | School-age              |

|                        |        |             |
|------------------------|--------|-------------|
| no                     | male   | Adolescent  |
| no                     | male   | School-age  |
| dexamethasone          | female | Preschooler |
| no                     | male   | School-age  |
| no                     | male   | Adolescent  |
| no                     | female | School-age  |
| dexamethasone          | female | Preschooler |
| no                     | female | Infant      |
| no                     | female | Preschooler |
| no                     | female | School-age  |
| no                     | female | School-age  |
| no                     | male   | Infant      |
| no                     | male   | Adolescent  |
| Dexamethasone +immunog | male   | School-age  |
| HYDROCORTISONE         | female | Infant      |
| no                     | male   | Infant      |
| dexamethasone          | female | Preschooler |
| HYDROCORTISONE         | male   | Preschooler |
| dexamethasone          | male   | Infant      |
| NO                     | male   | School-age  |
| dexamethasone          | female | School-age  |
| no                     | male   | Preschooler |
| no                     | male   | School-age  |
| no                     | female | Preschooler |
| dexamethasone          | male   | Infant      |
| no                     | female | Preschooler |
| no                     | female | Adolescent  |
| dexamethasone          | female | Infant      |

| <i><b>symptoms</b></i>                |
|---------------------------------------|
| fever, cough and respiratory distress |
| fever, cough and respiratory distress |
| fever and diarrhea                    |
| fever and cough                       |
| fever, cough and diarrhea             |
| fever, cough and vomiting             |
| fever and cough                       |
| fever, cough and respiratory distress |
| fever and cough                       |
| cough                                 |
| fever and diarrhea                    |
| fever, cough and respiratory distress |
| fever                                 |
| fever, cough and respiratory distress |
| fever, cough and diarrhea             |
| fever, cough and respiratory distress |
| fever, cough and respiratory distress |
| fever, cough and diarrhea             |
| fever                                 |
| fever, cough and diarrhea             |
| fever and cough                       |
| fever, cough and respiratory distress |
| fever, cough and respiratory distress |
| fever and cough                       |
| fever, cough and diarrhea             |
| fever and cough                       |
| fever and cough                       |
| fever and cough                       |
| fever and diarrhea                    |
| fever and cough                       |
| fever and cough                       |
| fever and diarrhea                    |
| fever, cough and diarrhea             |
| fever, cough and respiratory distress |
| fever, cough and respiratory distress |
| fever                                 |
| fever and cough                       |

|                                       |
|---------------------------------------|
| fever and cough                       |
| fever                                 |
| fever and diarrhea                    |
| fever and cough                       |
| fever, cough and diarrhea             |
| fever                                 |
| fever, cough and diarrhea             |
| fever, cough and vomiting             |
| fever and diarrhea                    |
| fever                                 |
| fever and cough                       |
| fever and cough                       |
| fever and cough                       |
| fever and diarrhea                    |
| fever, cough and diarrhea             |
| fever and cough                       |
| fever, cough and diarrhea             |
| fever, cough and respiratory distress |
| fever, cough and respiratory distress |
| fever                                 |
| fever, cough and respiratory distress |
| fever and diarrhea                    |
| fever                                 |
| fever and cough                       |
| fever, cough and respiratory distress |
| fever and diarrhea                    |
| fever and cough                       |
| fever, cough and vomiting             |
